# Supplementary material for: Predicting Intention to Receive COVID-19 Vaccination in People Living with HIV using an Integrated Behavior Model
Source: MDPI journal article supplement (doi:10.3390/vaccines11020296), 2023-01-29
Supplement: s1 [file s1]

Table S1. Analysis on items of each IBM component.

| Items                                                                                             | r     | B (p value)    | R     | R <sup>2</sup> |
|---------------------------------------------------------------------------------------------------|-------|----------------|-------|----------------|
| <b>Instrumental attitude</b>                                                                      |       |                | 0.497 | 0.232          |
| As long as I take ART regularly, I will be as healthy as non-HIV individual                       | 0.607 | 0.068 (0.209)  |       |                |
| To end the pandemic, I will still follow the health protocol after COVID-19 vaccination           | 0.821 | -0.021 (0.789) |       |                |
| Getting COVID-19 vaccination means I can protect my family                                        | 0.780 | -0.036 (0.672) |       |                |
| Getting COVID-19 vaccination means I can protect myself                                           | 0.761 | 0.070 (0.369)  |       |                |
| Vaccination against COVID-19 is one of the efforts to end the pandemic                            | 0.835 | 0.162 (0.062)  |       |                |
| Getting COVID-19 vaccination means I contribute to create herd immunity                           | 0.832 | 0.102 (0.233)  |       |                |
| COVID-19 vaccination can develop my immunity against COVID-19 infection                           | 0.527 | 0.068 (0.206)  |       |                |
| Getting COVID-19 vaccination will reduce the severity of SARS-CoV-2 infection once I get infected | 0.645 | 0.199 (0.001)* |       |                |
| <b>Subjective norm</b>                                                                            |       |                | 0.644 | 0.405          |
| I will receive COVID-19 vaccination because it is the government program                          | 0.648 | 0.150 (0.002)* |       |                |
| My work colleagues expect me to receive COVID-19 vaccination                                      | 0.824 | -0.027 (0.685) |       |                |
| My doctors expect me to receive COVID-19 vaccination                                              | 0.810 | 0.166 (0.011)* |       |                |
| My senior expects me to receive COVID-19 vaccination                                              | 0.814 | 0.128 (0.060)  |       |                |
| The religious leader that I respect expects me to receive COVID-19 vaccination                    | 0.766 | 0.150 (0.012)* |       |                |
| My family expect me to receive COVID-19 vaccination                                               | 0.743 | 0.202 (0.001)* |       |                |
| <b>Perceived of behavioral control</b>                                                            |       |                | 0.427 | 0.178          |
| How often you feel in ease situation to achieve your wish?                                        | 0.555 | 0.110 (0.036)* |       |                |
| How often your confidence "I can do it", dominate your daily activity?                            | 0.555 | 0.360 (<0.01)* |       |                |

\*Significance
